# Supplementary material for: Ingenious fabrication of metal–organic framework/graphene oxide composites as aptasensors with superior electrochemical recognition capability
Source: Royal Society of Chemistry journal article supplement (doi:10.1039/d0tc04176a), 2020-01-01
Supplement: d0tc04176a1.pdf [file d0tc04176a1.pdf]

## Supplementary Information

Ingenious fabrication of metal–organic framework/graphene oxide composites as aptasensors with superior electrochemical recognition capability

Qian-Qian Zhu,<sup>a</sup> Han-Wen Zhang,<sup>a</sup> Rongrong Yuan,<sup>b</sup> and Hongming He<sup>\*a</sup>

<sup>a</sup> *Tianjin Key Laboratory of Structure and Performance for Functional Molecules, College of Chemistry, Tianjin Normal University, Tianjin 300387, P. R. China.*

<sup>b</sup> *Department of Materials Science and Engineering, Jilin Jianzhu University, Changchun 130118, P. R. China.*

### Corresponding Author

\*E-mail: hehongminghz@163.com or hxyhxm@tjnu.edu.cn (for H. He)

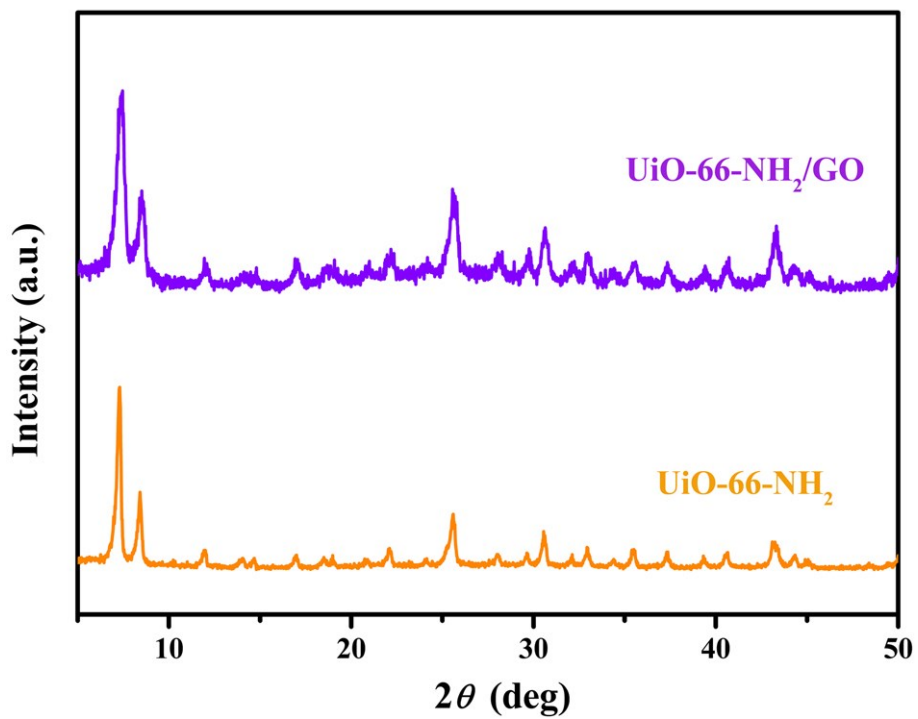

**Figure S1.** PXRD patterns of UiO-66-NH<sub>2</sub> and UiO-66-NH<sub>2</sub>/GO.

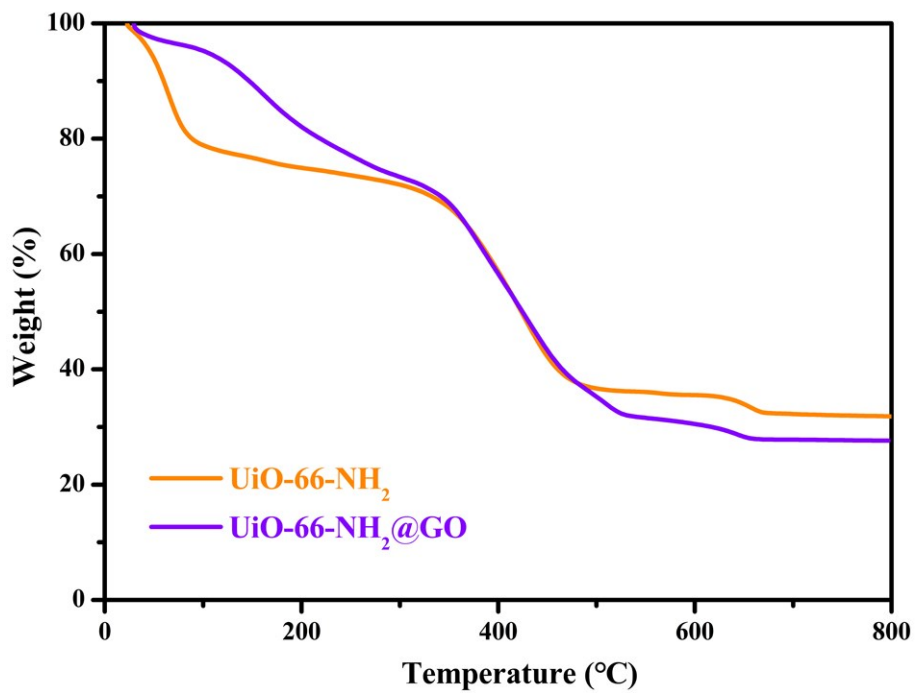

**Figure S2.** TGA curves of UiO-66-NH<sub>2</sub> and UiO-66-NH<sub>2</sub>/GO.

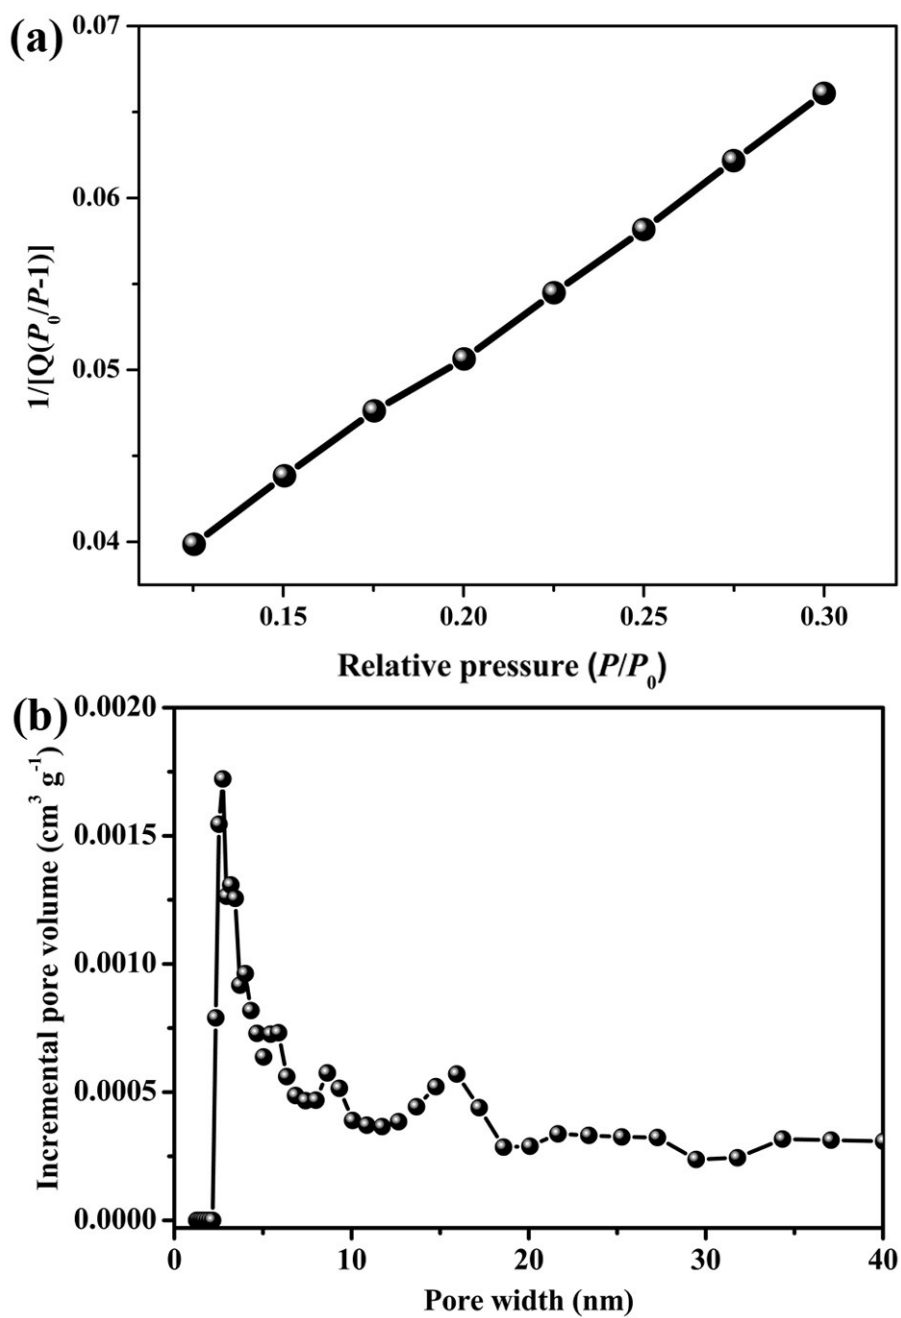

Figure S3. BET surface area plots and pore size distribution of GO.

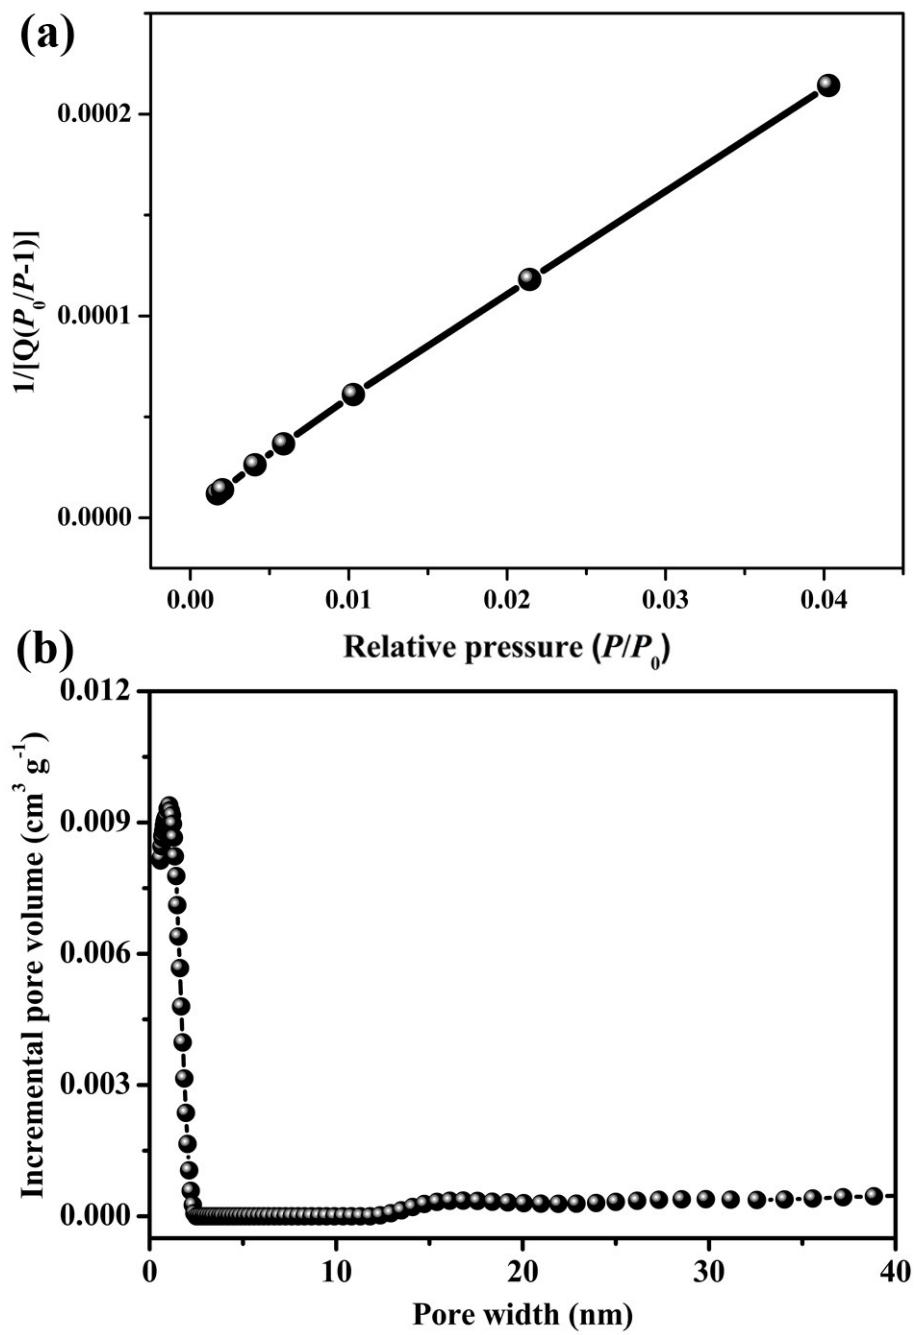

Figure S4. BET surface area plots and pore size distribution of UiO-66-NH<sub>2</sub>.

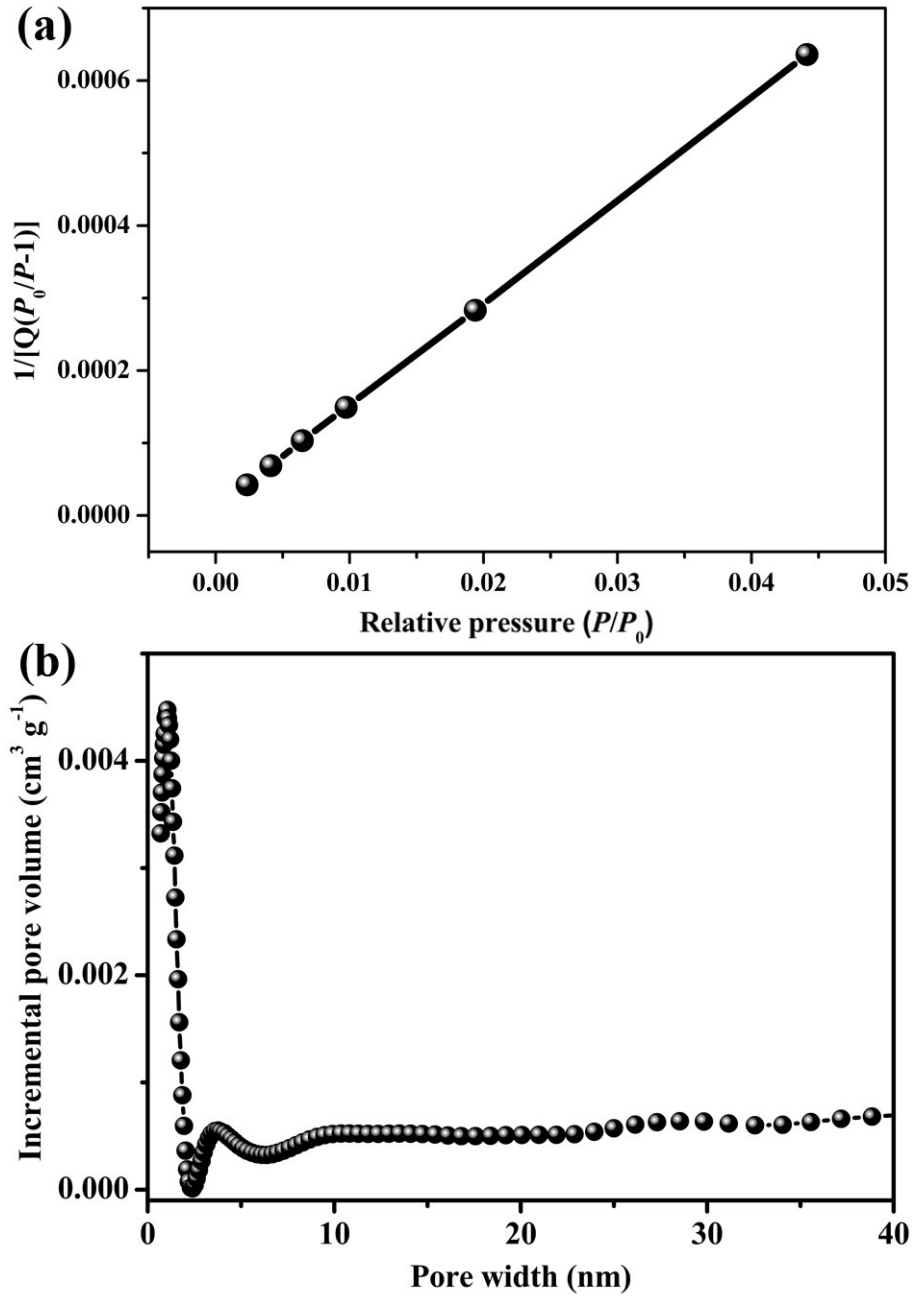

**Figure S5.** BET surface area plots and pore size distribution of UiO-66-NH<sub>2</sub>/GO.

**Table S1** BET surface area reports of GO, UiO-66-NH<sub>2</sub>, and UiO-66-NH<sub>2</sub>/GO.

| Material                   | BET ( $\text{m}^2 \text{g}^{-1}$ ) | Slope ( $\text{g cm}^{-3}$ ) | Y-Intercept ( $\text{g cm}^{-3}$ ) | C           | Qm ( $\text{cm}^3 \text{g}^{-1}$ ) | Correlation Coefficient |
|----------------------------|------------------------------------|------------------------------|------------------------------------|-------------|------------------------------------|-------------------------|
| GO                         | $25.6593 \pm 0.2694$               | $0.148309 \pm 0.001739$      | $0.021320 \pm 0.000383$            | 7.956219    | 5.8952                             | 0.9995878               |
| UiO-66-NH <sub>2</sub>     | $831.6632 \pm 8.2183$              | $0.005229 \pm 0.000052$      | $0.000005 \pm 0.000001$            | 1076.771264 | 191.0737                           | 0.9997556               |
| UiO-66-NH <sub>2</sub> /GO | $307.0955 \pm 0.8324$              | $0.014163 \pm 0.000038$      | $0.000010 \pm 0.000001$            | 1371.065264 | 70.5548                            | 0.9999853               |

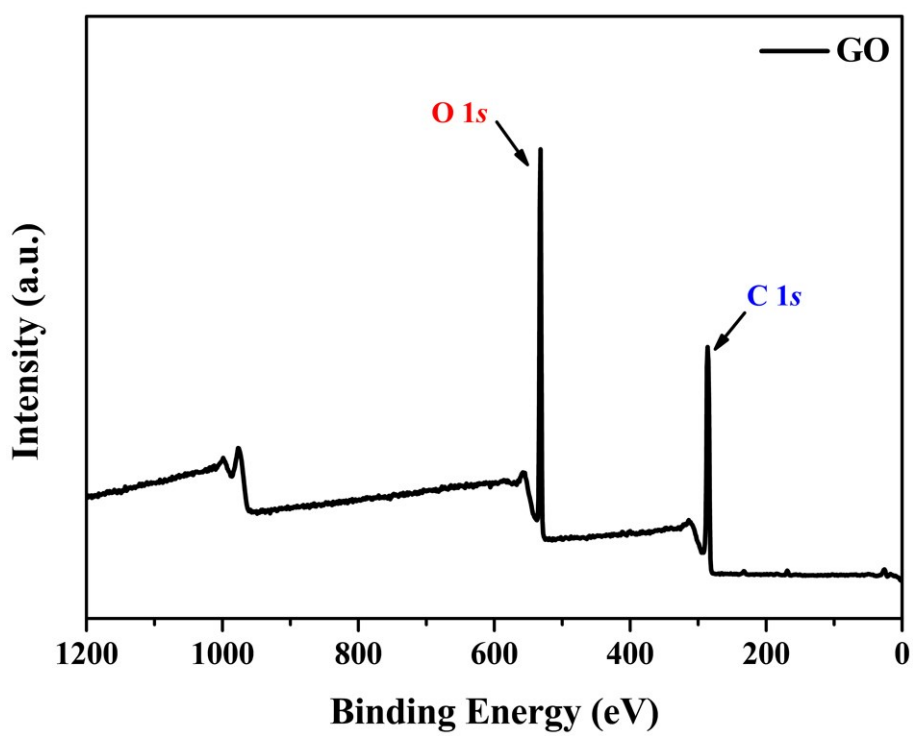

**Figure S6.** The full XPS survey scan spectrum of GO.

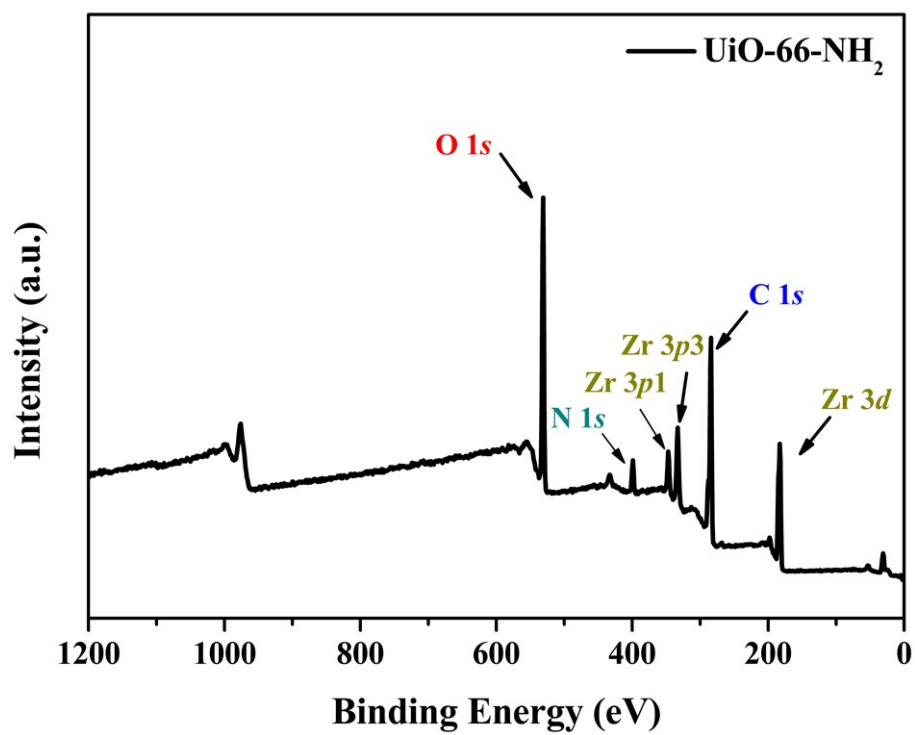

**Figure S7.** The full XPS survey scan spectrum of UiO-66-NH<sub>2</sub>.



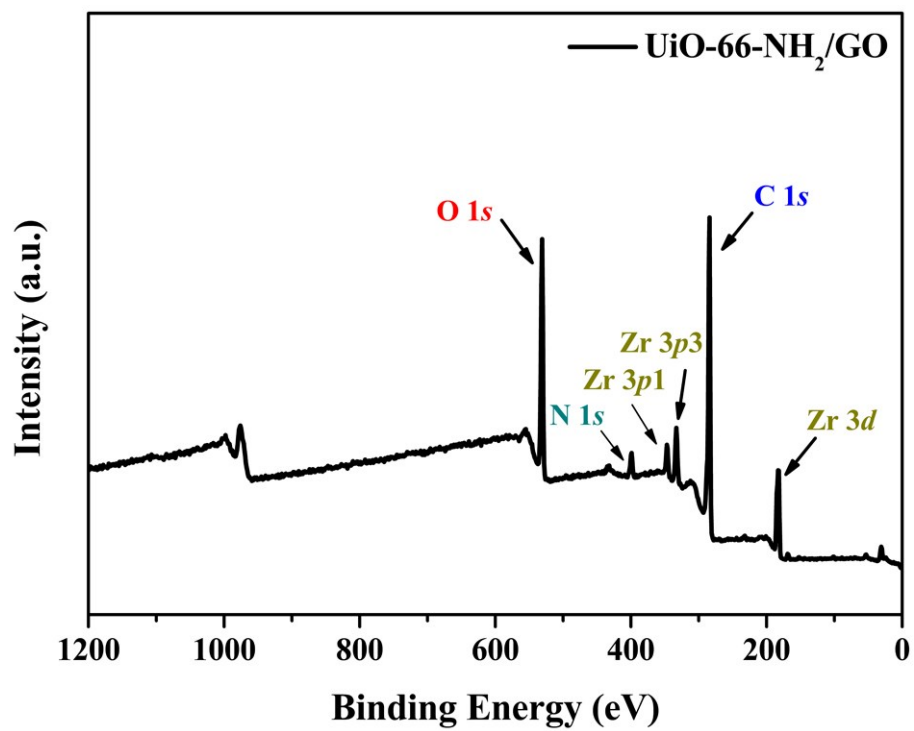

**Figure S8.** The full XPS survey scan spectrum of UiO-66-NH<sub>2</sub>/GO.

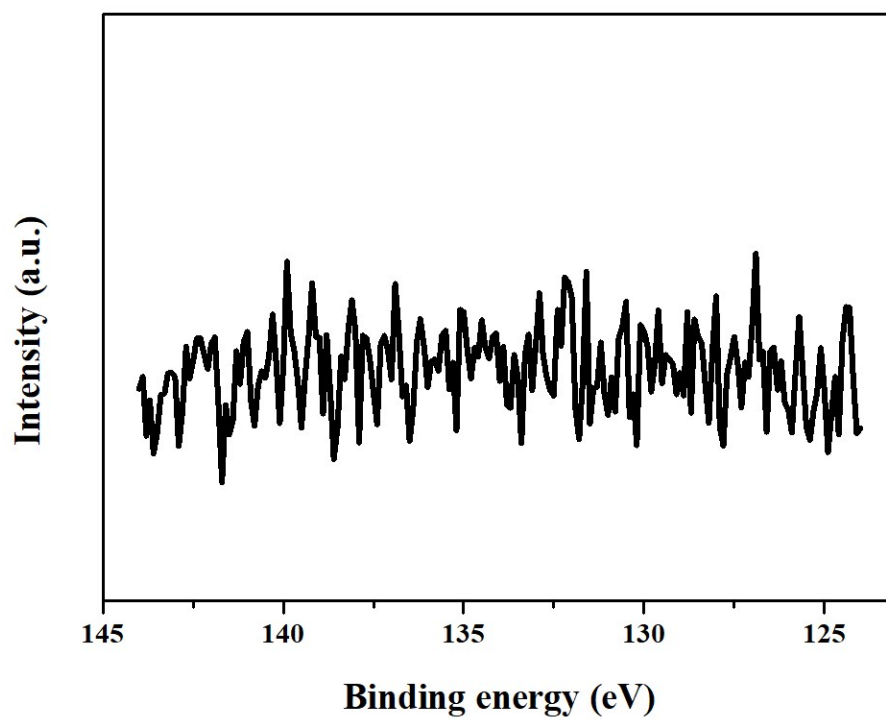

**Figure S9.** The high-resolution XPS spectrum of P 2*p* in UiO-66-NH<sub>2</sub>/GO.

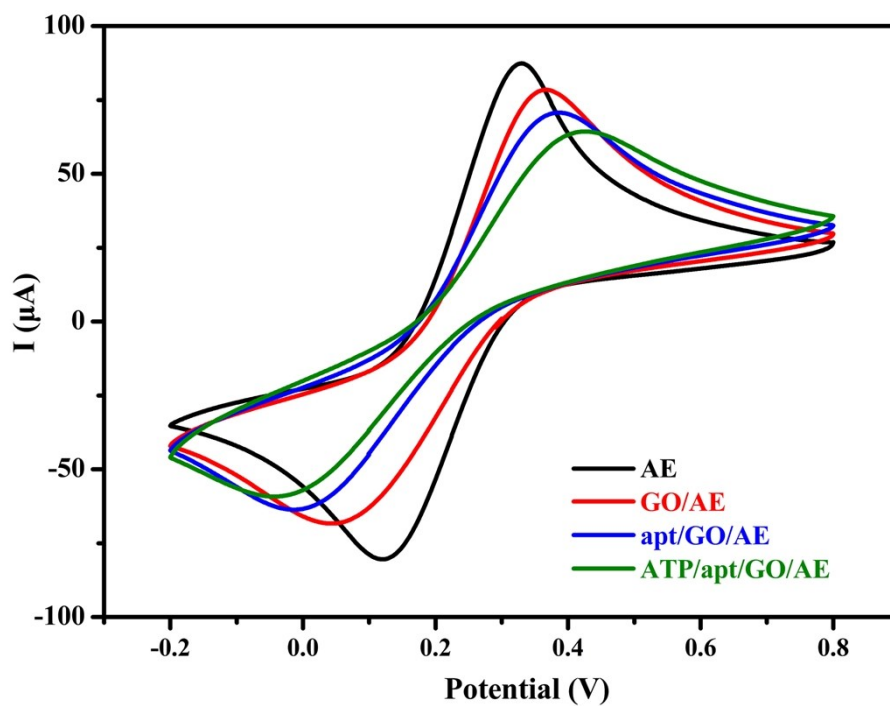

**Figure S10.** CV curves of different modified electrodes for the GO-based aptasensor.

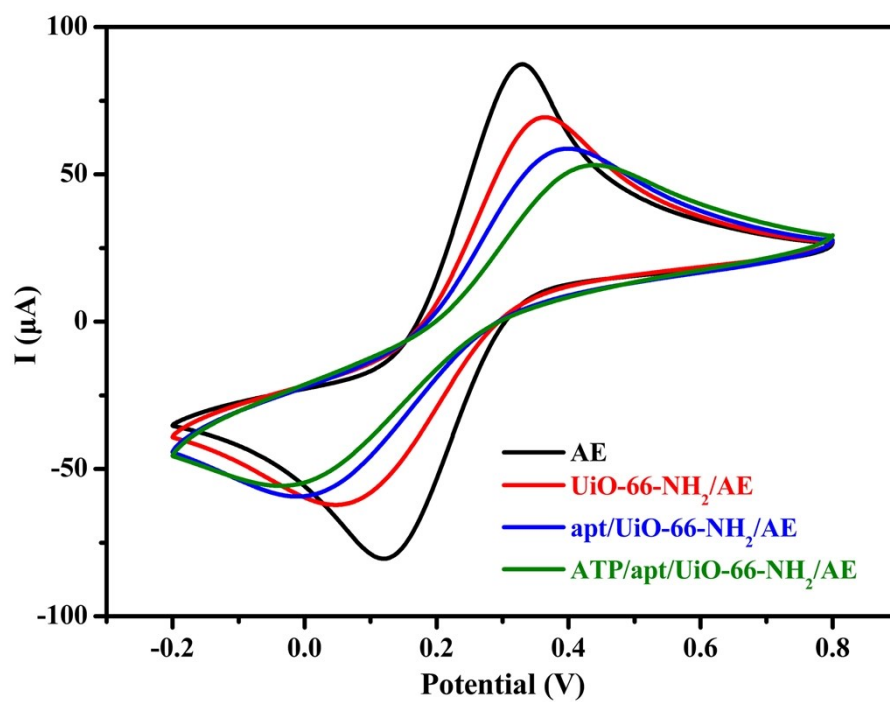

**Figure S11.** CV curves of different modified electrodes for the UiO-66-NH<sub>2</sub>-based aptasensor.

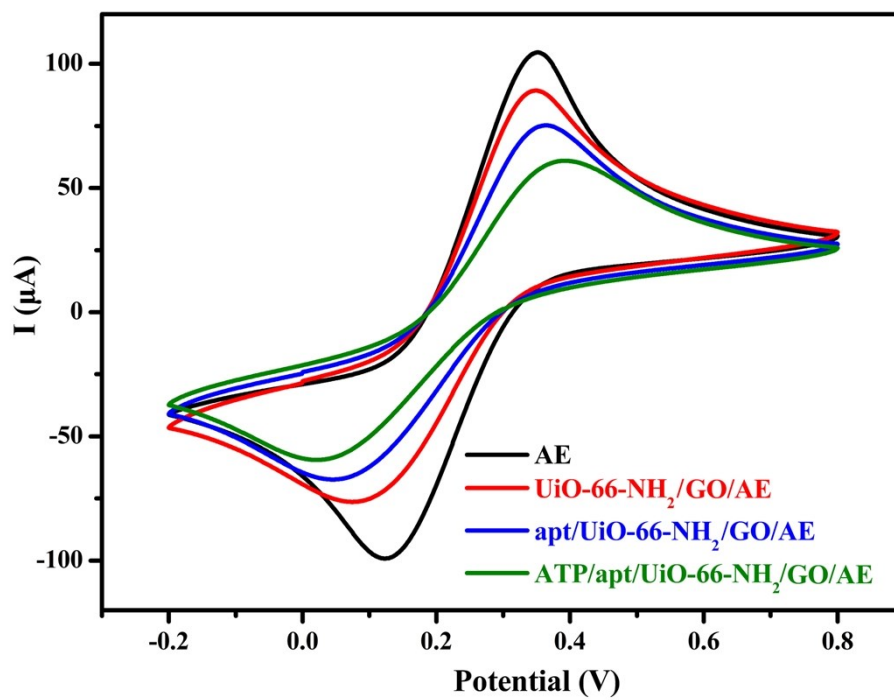

**Figure S12.** CV curves of different modified electrodes for the UiO-66-NH<sub>2</sub>/GO-based aptasensor.

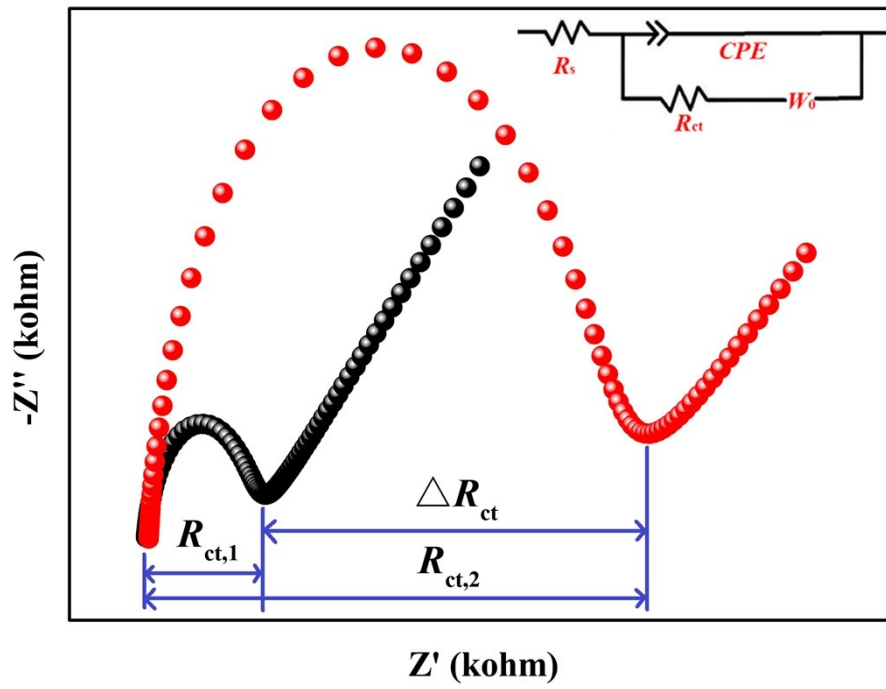

**Figure S13.** EIS Nyquist plots and equivalent circuit.
